# Supplementary material
Source: Springer Nature journal article supplement (https://www.springermedizin.de/resource/supplementary/12885_2013_4500_MOESM2_ESM.pdf/9466576)

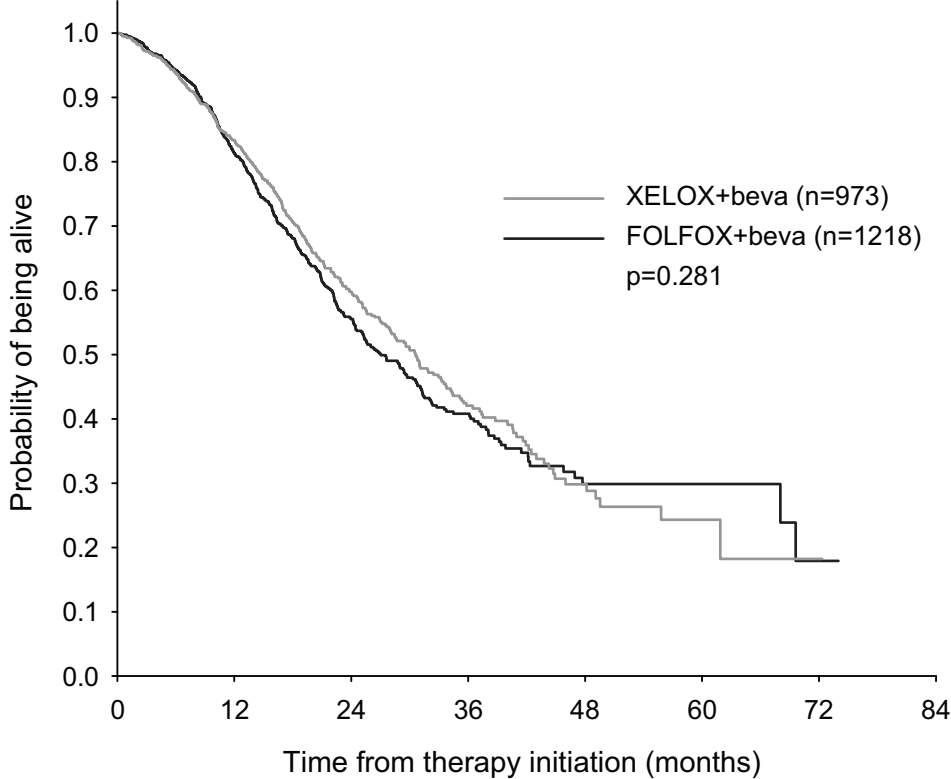

n at risk

|             |     |     |     |    |    |   |   |
|-------------|-----|-----|-----|----|----|---|---|
| XELOX+beva  | 671 | 270 | 104 | 31 | 6  | 1 | 0 |
| FOLFOX+beva | 784 | 310 | 107 | 30 | 14 | 3 | 0 |

Supplement: MOESM2 [file 9466576]
